# Supplementary material for: Structural Insights into the SPRED1-Neurofibromin-KRAS Complex and Disruption of SPRED1-Neurofibromin Interaction by Oncogenic EGFR
Source: PubMed Central journal article supplement (PMC7437355; doi:10.1016/j.celrep.2020.107909), 2020-07-21
Supplement: NIHMS1613940-supplement-1.pdf [file NIHMS1613940-supplement-1.pdf]

Cell Reports, Volume 32

## Supplemental Information

### **Structural Insights into the SPRED1-Neurofibromin- KRAS Complex and Disruption of SPRED1- Neurofibromin Interaction by Oncogenic EGFR**

**Wupeng Yan, Evan Markegard, Srisathiyarayanan Dharmaiah, Anatoly Urisman, Matthew Drew, Dominic Esposito, Klaus Scheffzek, Dwight V. Nissley, Frank McCormick, and Dharendra K. Simanshu**

**Structural insights into the SPRED1-neurofibromin-KRAS complex and  
disruption of SPRED1-neurofibromin interaction by oncogenic EGFR**

**Wupeng Yan<sup>a,1</sup>, Evan Markegard<sup>b,1</sup>, Srisathiyarayanan Dharmaiah<sup>a</sup>,  
Anatoly Urisman<sup>b</sup>, Matthew Drew<sup>a</sup>, Dominic Esposito<sup>a</sup>, Klaus Scheffzek<sup>c</sup>, Dwight V. Nissley<sup>a</sup>,  
Frank McCormick<sup>a,b,#</sup>, Dharendra K. Simanshu<sup>a,#</sup>**

**SUPPLEMENTARY INFORMATION**

- **Figure S1-S7**
- **Table S1-S3**

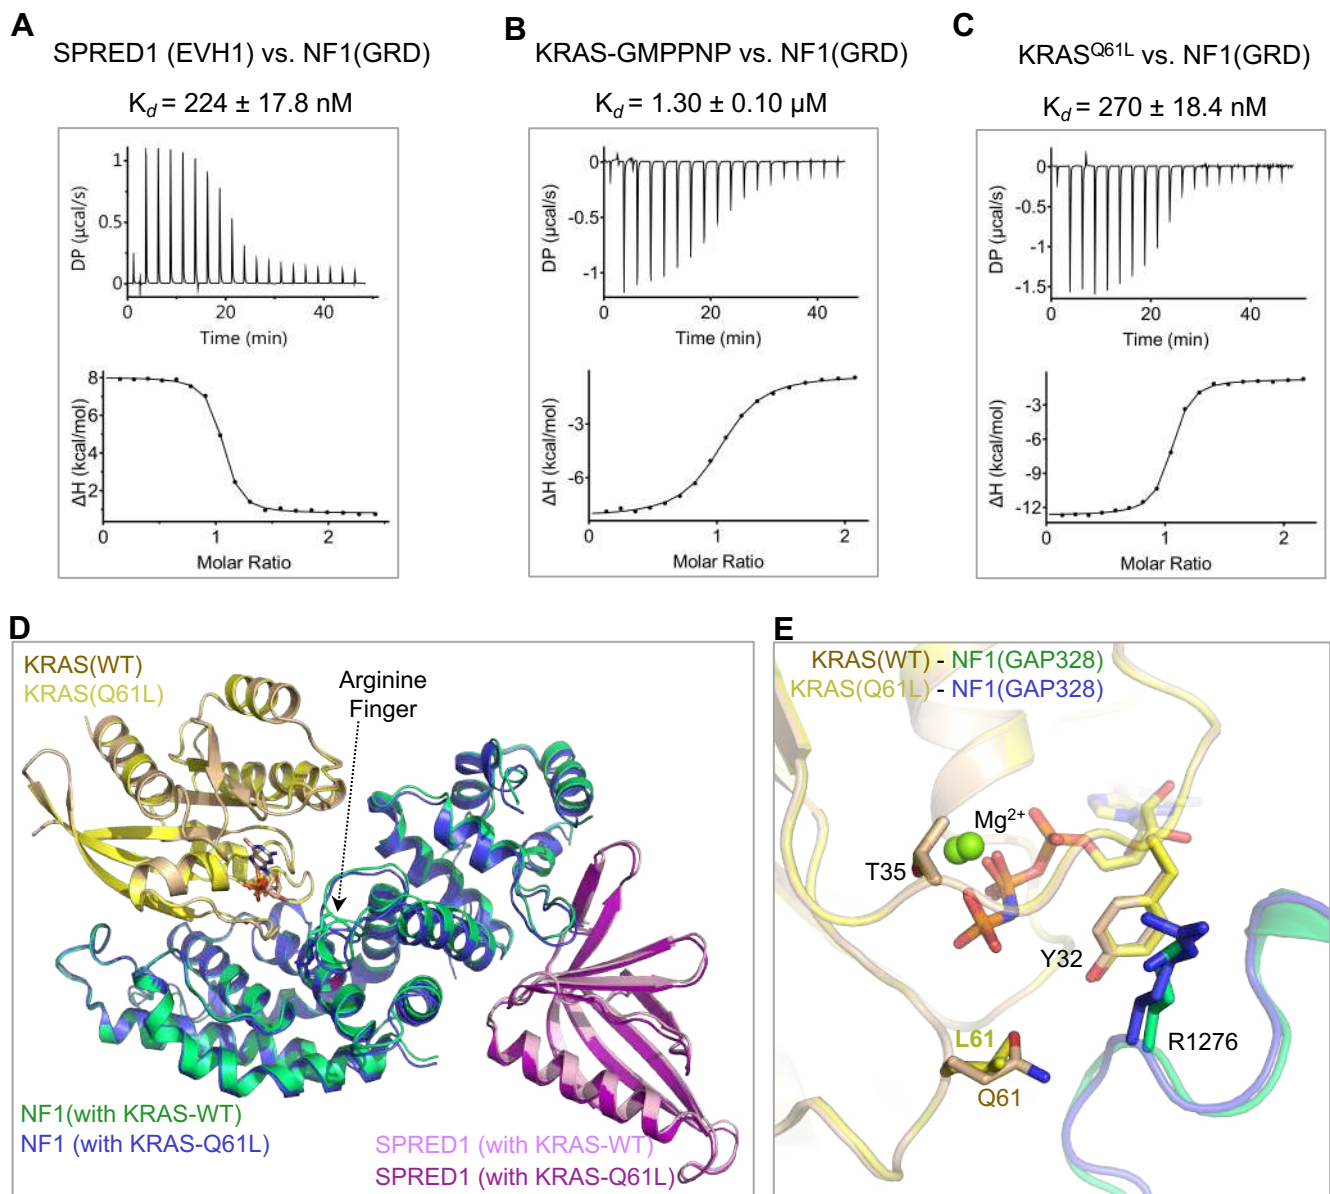

**Figure S1. Intermolecular protein-protein interactions in KRAS-NF1(GRD)-Spred1(EVH1) complex and structural comparison between ternary complexes containing wild-type and Q61L-mutant of KRAS.** (A-C) ITC titration experiment to measure the dissociation constant between (A) Spred1(EVH1) and NF1(GRD), (B) KRAS(WT)-GMPPNP and NF1(GRD), and (C) KRAS(Q61L)-GMPPNP and NF1(GRD). (D) Structural superposition of the ternary complexes containing wild-type and Q61L-mutant of KRAS. The proteins are shown in ribbon representation, whereas nucleotide GMPPNP and the arginine finger are shown in stick representation. (E) Enlarged view of the active site pocket in the ternary complexes containing wild-type and Q61L-mutant of KRAS. The arginine finger from NF1, nucleotide GMPPNP, and KRAS residues are shown in stick representation whereas  $Mg^{2+}$  are shown as spheres.

Related to Figure 1.

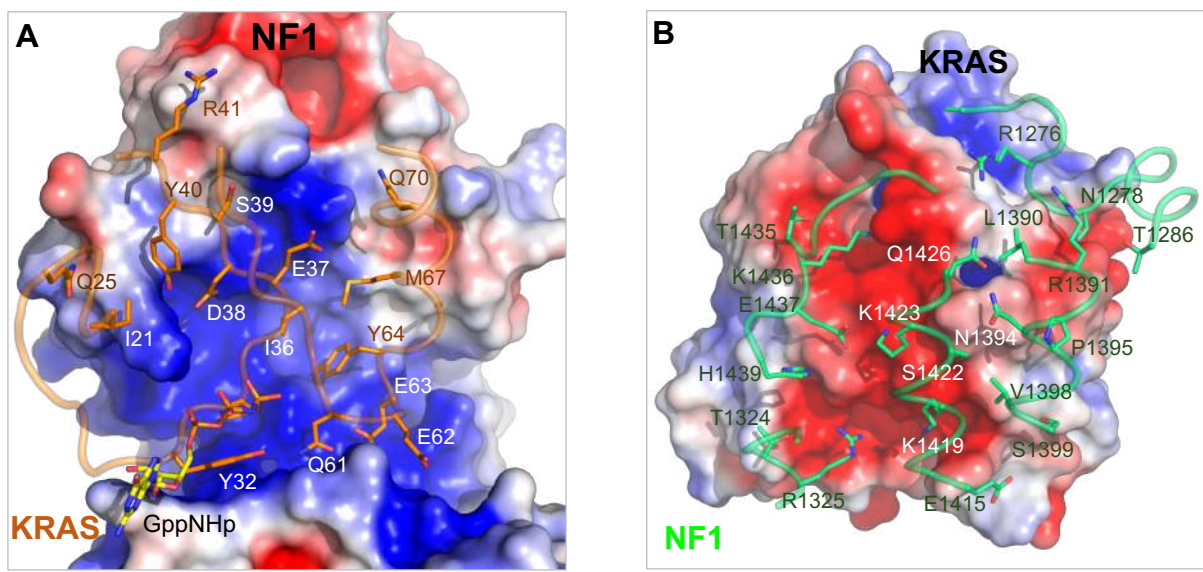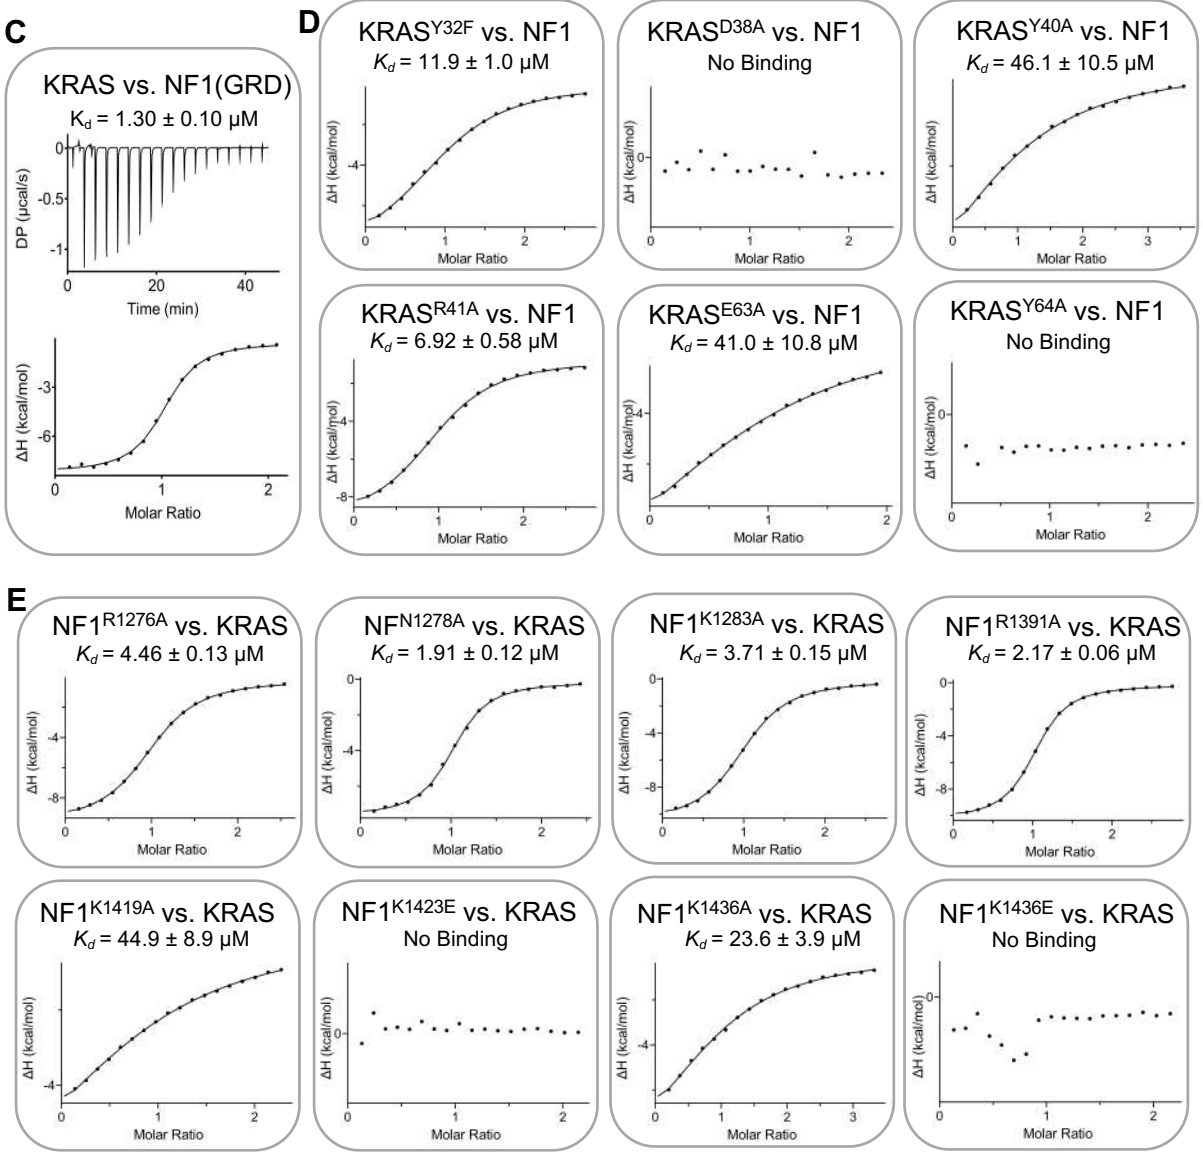

**Figure S2. The KRAS-NF1(GRD) interaction interface and the impact of KRAS and NF1 mutations for residues involved in KRAS-NF1(GRD) interaction. (A)** KRAS(GMPPNP)-NF1(GRD) interaction interface, with NF1 shown in electrostatic surface representation and the KRAS regions that participate at the interface shown in cartoon mode and colored brown. The KRAS

residues which are important for the interaction are highlighted in stick mode. **(B)** KRAS(GMPPNP)-NF1(GRD) interaction interface, with KRAS shown in electrostatic surface representation and the NF1(GRD) regions that participate at the interface shown in cartoon mode and colored green. The NF1 residues that are important for the interaction are highlighted in stick representation. **(C)** ITC titration experiment to measure the dissociation constant between KRAS(WT)-GMPPNP and NF1(GRD). **(D)** The dissociation constant of KRAS mutants with NF1(GRD) measured using ITC titration experiments. **(E)** The dissociation constant of NF1 mutants with KRAS(GMPPNP) measured using ITC titration experiments.

**Related to Figure 2.**

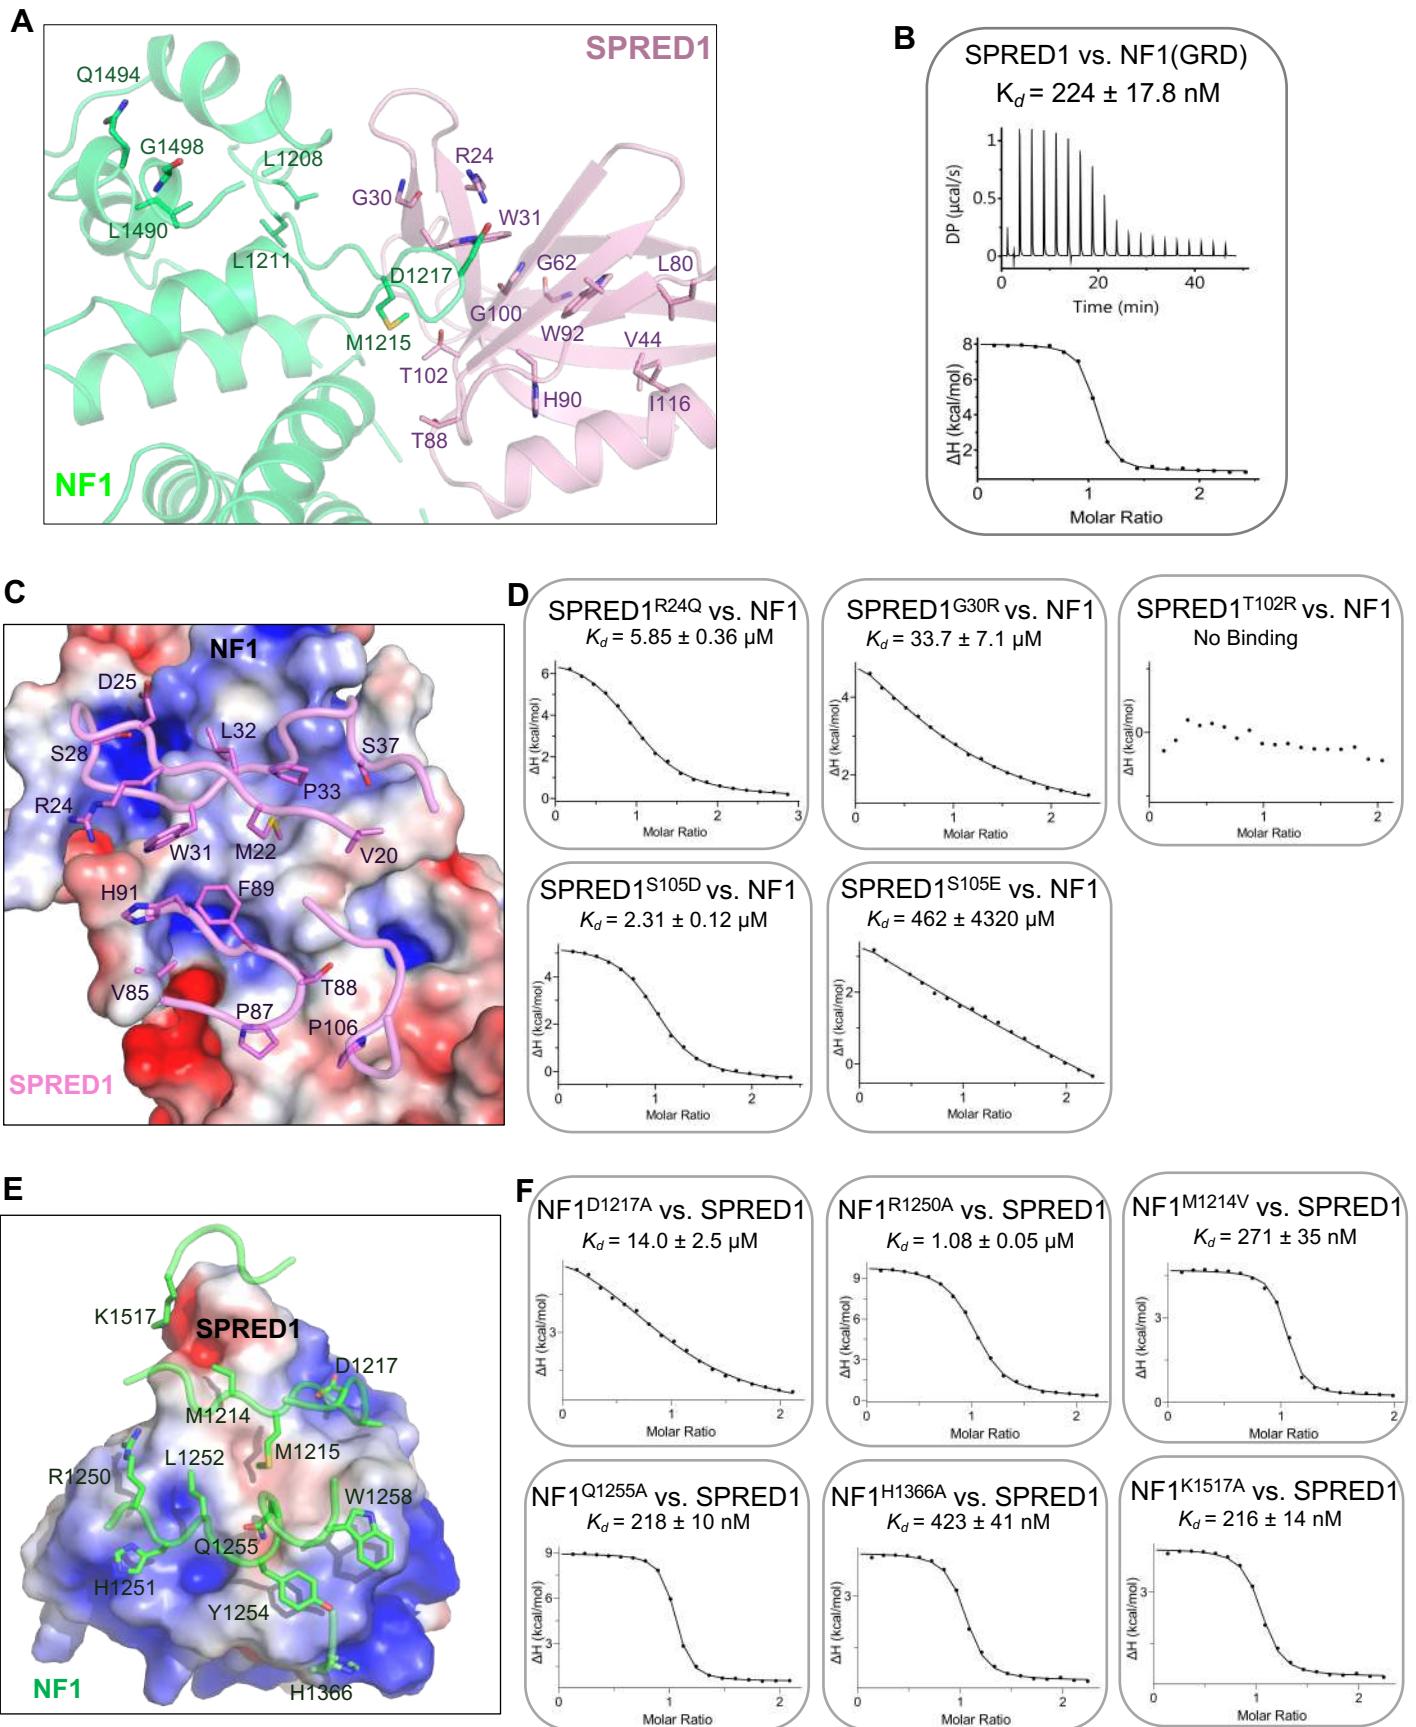

**Figure S3. The SPRED1(EVH1)-NF1(GRD) interaction interface and the impact of SPRED1 and NF1 mutations observed in Legius syndrome and neurofibromatosis type 1 disease. (A) Mapping the pathogenic mutations observed**

in SPRED1 (light pink) and NF1 (green) on the SPRED1-NF1 complex present in the ternary complex. **(B)** ITC titration experiment to measure the dissociation constant between NF1(GRD) and SPRED1(EVH1). **(C)** SPRED1(EVH1)-NF1(GRD) interaction interface, with NF1 shown in electrostatic surface representation and the SPRED1 regions that participate at the interface shown in cartoon mode and colored light pink. The SPRED1 residues that are important for the interaction are highlighted in stick representation. **(D)** Dissociation constant of SPRED1 mutants with NF1(GRD) measured using ITC titration experiments. **(E)** SPRED1(EVH1)-NF1(GRD) interaction interface, with SPRED1 shown in electrostatic surface representation and the NF1 regions that participate at the interface shown in cartoon mode and colored green. The NF1 residues that are important for the interaction are highlighted in stick representation. **(F)** Dissociation constant of NF1(GRD) mutants with SPRED1(EVH1) measured using ITC titration experiments.

**Related to Figure 4.**



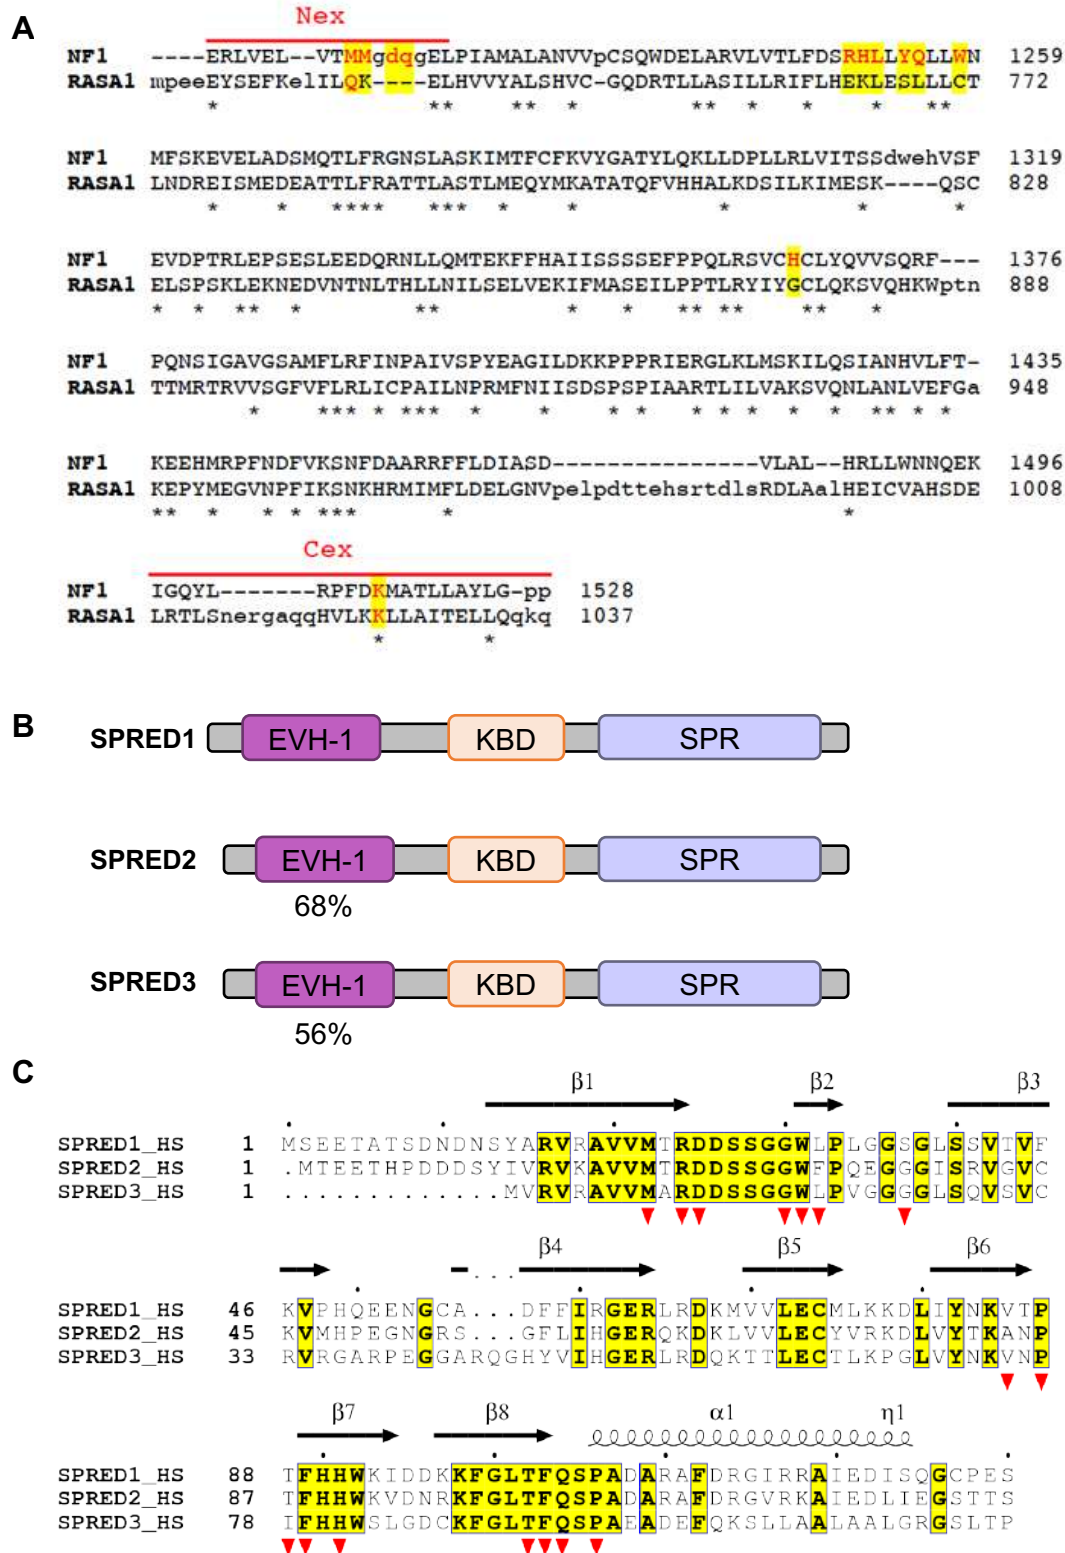

**Figure S4. Sequence analysis of human RasGAP and SPRED proteins.**

(A) Amino acid sequence alignment between NF1(GRD) and RASA1(GRD). The conserved residues between RASA1 and NF1 are marked with a star. The NF1 residues that participate in the interaction with SPRED1 are highlighted in yellow. The N- and C-terminal residues that form the GAPex region are shown in the alignment (red line). (B) Domain architecture of human SPRED1, SPRED2, and SPRED3.



The three conserved domains, EVH1, KBD, and SPR, are shown in different colors. The sequence identity of residues located in the EVH1 domain of SPRED1, SPRED2, and SPRED3 are shown under the panels (compared to SPRED1). (C) Amino acid sequence alignment of human SPRED1, SPRED2, and SPRED3. Conserved residues among the SPRED family are highlighted in yellow. The secondary structure of SPRED1 is shown above the alignment. The SPRED1 residues that are involved in the interaction with NF1(GRD) are shown with red inverted triangles.

**Related to Figure 5.**

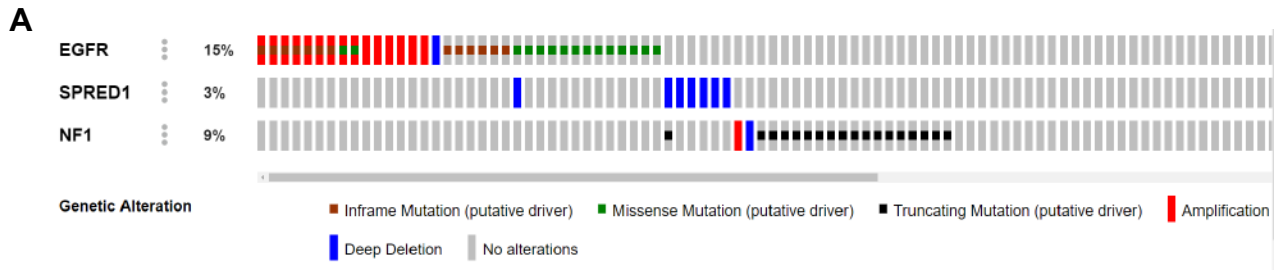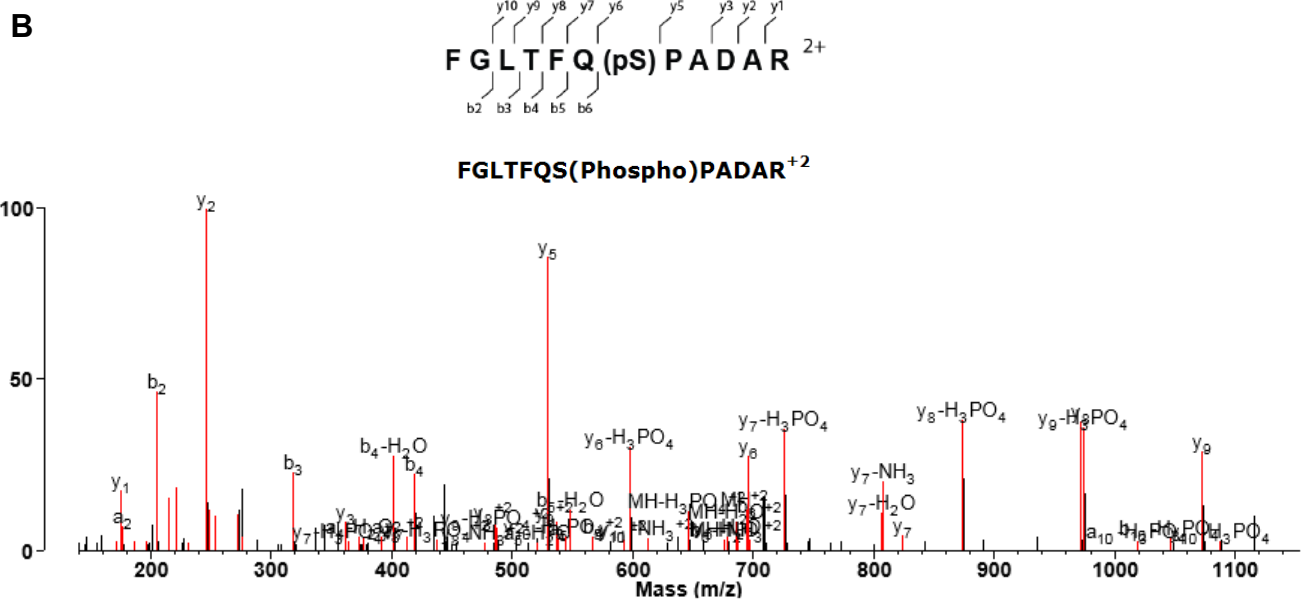

**Figure S5. Lung adenocarcinoma genetics and phospho-SPRED1(S105) mass spectrometry.** (A) EGFR, SPRED1, and NF1 human lung adenocarcinoma genetics with visualization using cBioPortal (n=230). Variants of unknown significance were excluded. (B) Spectrum and annotated phospho-SPRED1(S105) peptide.

Related to Figure 6.

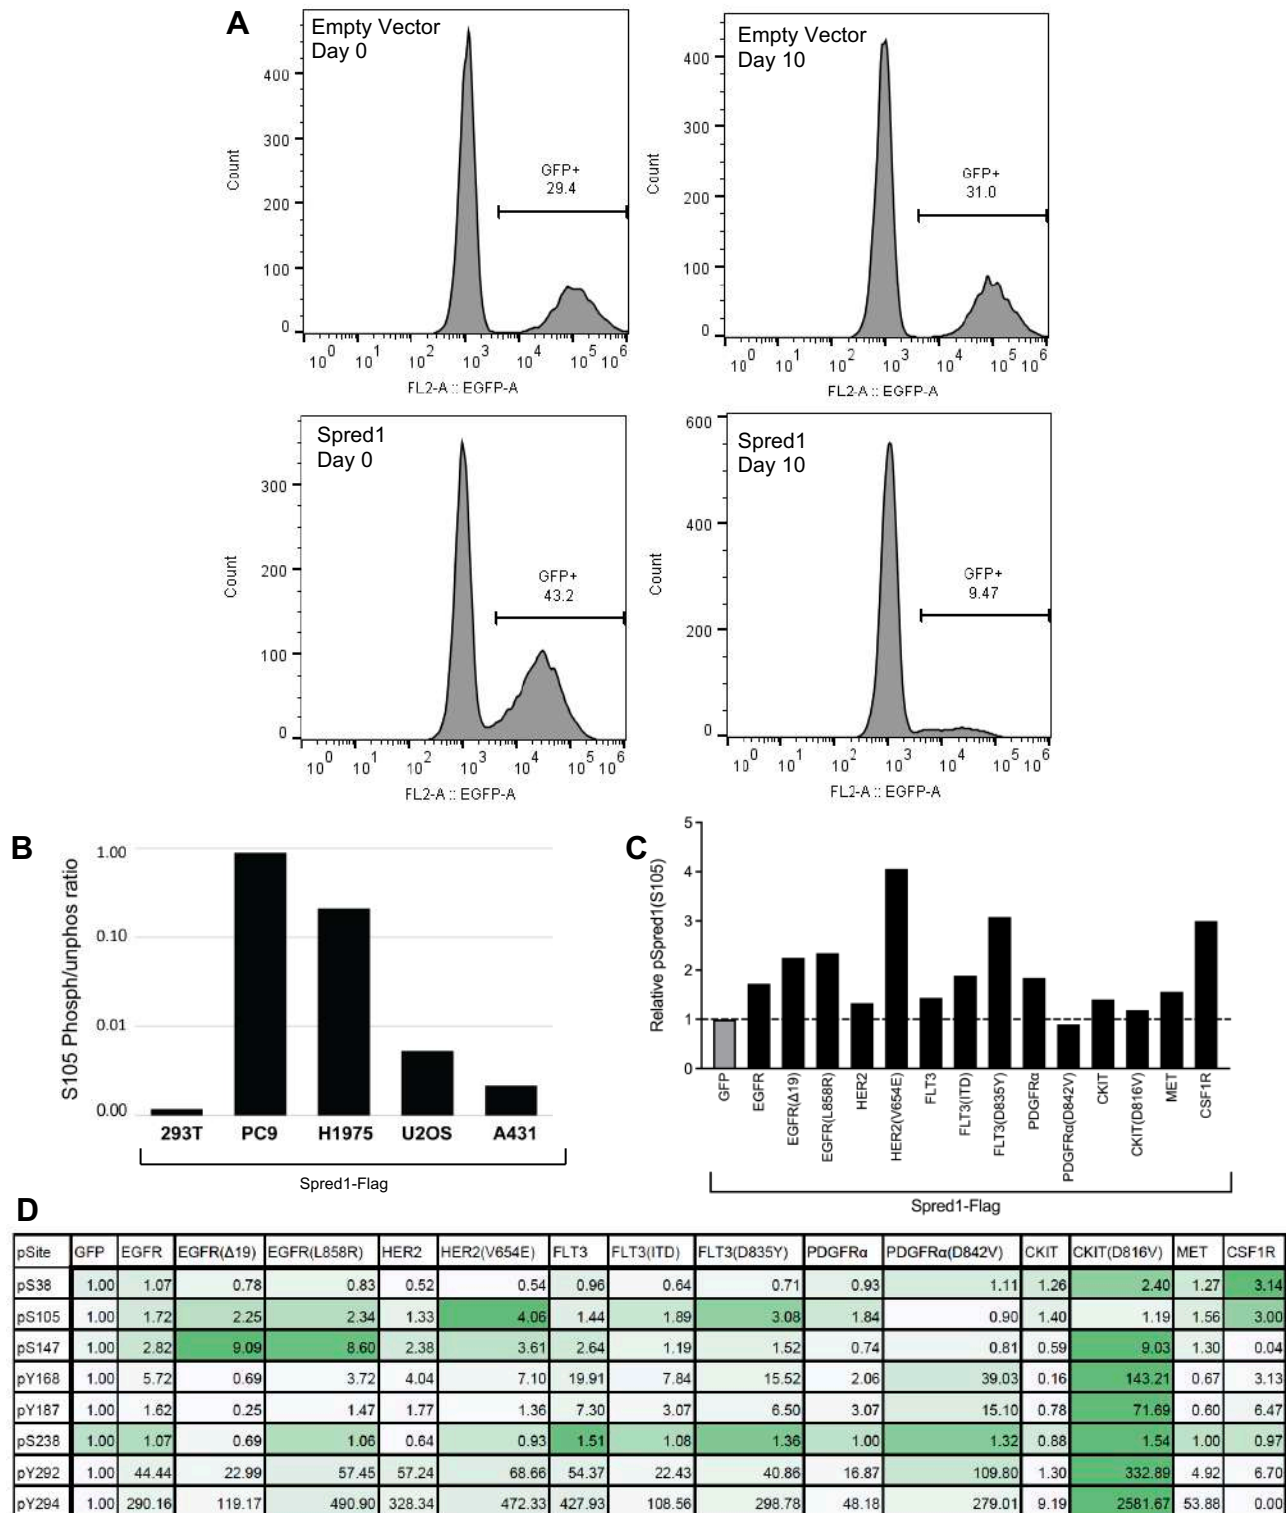

**Figure S6: Representative flow cytometry GFP histograms and RTK panel screen.** (A) Representative K562 flow cytometry histograms from SPRED1-IRES-GFP and Empty Vector-IRES-GFP-expressing retrovirus cells. The competition experiment began 3 days after infection, indicated by day 0, and concluded on day 10. (B) Proportion of phosphorylated to unphosphorylated SPRED1 at the S105 site was estimated as a ratio of intensities of phosphorylated and unphosphorylated S105-containing peptides detected by MS. (C) RTK panel screen for phosphorylated SPRED1(S105). (D) Heat map of all SPRED1 phosphorylation sites with RTK expression from LC-MS/MS.

**Related to Figure 7.**

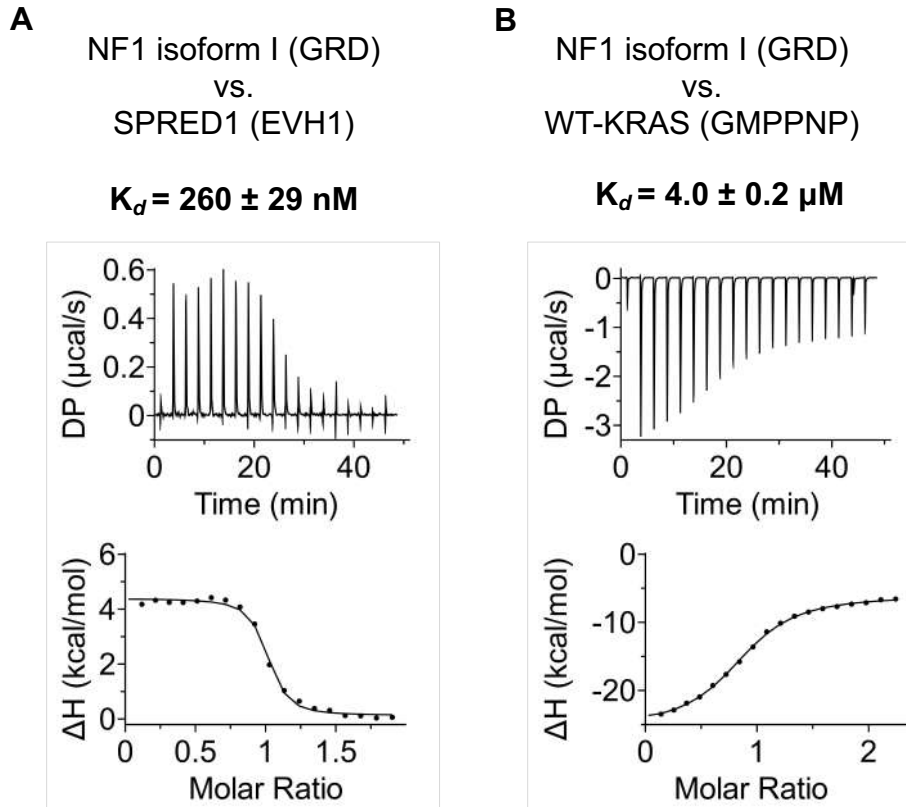

**Figure S7. Effect of 23 amino acid insertion in the GAP-related domain of NF1 isoform I on its ability to interact with SPRED1(EVH1) and KRAS-GMPPNP (A-B) ITC titration experiment to measure the dissociation constant between (A) SPRED1(EVH1) and NF1 isoform I(GRD), (B) KRAS(WT)-GMPPNP and NF1 isoform I (GRD).**

**Related to Figure 1.**

**Table S1: Crystallographic data collection and refinement statistics.**

|                                       | <b>WT-KRAS(GMPPNP)-<br/>NF1(GRD)-<br/>SPRED1(EVH1)</b> | <b>Q61L-KRAS(GMPPNP)-<br/>NF1(GRD)-<br/>SPRED1(EVH1)</b> |
|---------------------------------------|--------------------------------------------------------|----------------------------------------------------------|
| <b>Data collection</b>                |                                                        |                                                          |
| Resolution (Å)                        | 79.18 – 2.76 (2.92 – 2.76) *                           | 78.33 - 2.54 (2.69 - 2.54)                               |
| Space group                           | P 1 2 <sub>1</sub> 1                                   | P 1 2 <sub>1</sub> 1                                     |
| Cell dimensions                       |                                                        |                                                          |
| a, b, c (Å)                           | 72.6, 70.6, 80.3                                       | 72.0, 70.2, 79.7                                         |
| $\alpha$ , $\beta$ , $\gamma$ (°)     | 90.0, 99.6, 90.0                                       | 90.0, 100.7, 90.0                                        |
| Mean I/sigma(I)                       | 11.7 (2.0)                                             | 11.5 (1.6)                                               |
| Completeness (%)                      | 97.6 (95.2)                                            | 98.2 (95.0)                                              |
| Redundancy                            | 4.3 (4.3)                                              | 3.4 (3.3)                                                |
| Wilson B Factor (Å <sup>2</sup> )     | 65.53                                                  | 53.50                                                    |
| R-meas                                | 0.083 (0.709)                                          | 0.082 (0.954)                                            |
| R-merge                               | 0.073 (0.624)                                          | 0.069 (0.802)                                            |
| CC1/2                                 | 0.998 (0.873)                                          | 0.998 (0.801)                                            |
| <b>Refinement</b>                     |                                                        |                                                          |
| No. reflections                       | 20174                                                  | 25425                                                    |
| R <sub>work</sub> / R <sub>free</sub> | 0.2208/0.2449                                          | 0.2160/0.2639                                            |
| Number of non-H atoms                 | 4606                                                   | 4636                                                     |
| Protein                               | 4555                                                   | 4565                                                     |
| Ligand                                | 46                                                     | 46                                                       |
| Water                                 | 5                                                      | 25                                                       |
| B-factors (Å <sup>2</sup> )           | 96.3                                                   | 87.9                                                     |
| Protein                               | 96.5                                                   | 88.2                                                     |
| Ligand                                | 71.4                                                   | 66.4                                                     |
| Water                                 | 80.6                                                   | 70.6                                                     |
| Ramachandran plot                     |                                                        |                                                          |
| Favored                               | 97.53%                                                 | 96.30%                                                   |
| Allowed                               | 2.47%                                                  | 3.70%                                                    |
| R.m.s deviations                      |                                                        |                                                          |
| Bond lengths (Å)                      | 0.004                                                  | 0.006                                                    |
| Bond angles (°)                       | 0.66                                                   | 0.80                                                     |

\*Highest resolution shell is shown in parenthesis.

**Related to Figure 1.**

**Table S2: A summary of residue-pairs that are involved in hydrogen bond, salt-bridge and hydrophobic interactions at the KRAS-NF1 interface in the structure of SPRED1-NF1-KRAS complex.**

| KRAS Region          | Hydrogen Bond |           | Salt Bridge |           | Hydrophobic Interaction |       |
|----------------------|---------------|-----------|-------------|-----------|-------------------------|-------|
|                      | KRAS          | NF1       | KRAS        | NF1       | KRAS                    | NF1   |
| <b>Switch I</b>      | Y32 O         | R1276 Nε  | E37 Oε1     | K1419 Nζ  | Y32                     | R1276 |
|                      | Y32 Oη        | G1277 N   | D38 Oδ1     | K1423 Nζ  | Y32                     | G1277 |
|                      | D33 Oδ1       | N1430 Nδ2 |             |           | Y32                     | Q1272 |
|                      | E37 O         | K1423 Nζ  |             |           | D33                     | N1430 |
|                      | S39 Oγ        | R1325 Nη2 |             |           | P34                     | R1276 |
|                      | S39 N         | E1437 Oε1 |             |           | P34                     | L1390 |
|                      |               |           |             |           | T35                     | K1436 |
|                      |               |           |             |           | I36                     | S1422 |
|                      |               |           |             |           | E37                     | K1419 |
|                      |               |           |             |           | D38                     | E1437 |
|                      |               |           |             |           | D38                     | K1423 |
|                      |               |           |             |           | D38                     | K1436 |
|                      |               |           |             |           | S39                     | R1325 |
|                      |               |           |             |           | Y40                     | K1436 |
| <b>Switch II</b>     | Q61 Nε2       | G1277 O   | E62 Oε1     | K1283 Nζ  | G60                     | N1278 |
|                      | E62 N         | N1278 Oδ1 | E63 Oε1     | K1283 Nζ  | Q61                     | G1277 |
|                      | E63 Oε1       | T1286 Oγ1 | E63 Oε2     | R1391 Nε  | Q61                     | R1391 |
|                      | E63 Oε2       | N1278 Nδ2 |             |           | E62                     | N1278 |
|                      | Y64 Oη        | L1390 O   |             |           | E62                     | K1283 |
|                      |               |           |             |           | E63                     | R1391 |
|                      |               |           |             |           | E63                     | P1395 |
|                      |               |           |             |           | E63                     | N1278 |
|                      |               |           |             |           | E63                     | T1286 |
|                      |               |           |             |           | Y64                     | L1390 |
|                      |               |           |             |           | Y64                     | P1395 |
|                      |               |           |             |           | Y64                     | N1394 |
|                      |               |           |             |           | A66                     | S1399 |
|                      |               |           |             |           | A66                     | E1402 |
| <b>Other Regions</b> | Q25 Nε2       | K1436 O   | D54 Oδ1     | R1325 Nη1 | S17                     | K1436 |
|                      |               |           | D54 Oδ2     | R1325 Nη2 | Q25                     | K1436 |
|                      |               |           |             |           | D54                     | R1325 |
|                      |               |           |             |           | K88                     | C1233 |
|                      |               |           |             |           |                         |       |

Related to Figure 2.



**Table S3: A summary of residue-pairs that are involved in hydrogen bond, salt-bridge and hydrophobic interactions at the SPRED1-NF1 interface in the structure of SPRED1-NF1-KRAS complex.**

| NF1 Region  | Hydrogen Bond        |                  | Salt Bridge        |                | Hydrophobic Interaction |        |
|-------------|----------------------|------------------|--------------------|----------------|-------------------------|--------|
|             | NF1                  | SPRED1           | NF1                | SPRED1         | NF1                     | SPRED1 |
| N-ter GAPex | M1215 N              | W31 O            | D1217 O $\delta$ 1 | R24 N $\eta$ 1 | E1210                   | L32    |
|             | M1215 O              | W31 N            | D1217 O $\delta$ 2 | R24 N $\eta$ 1 | M1214                   | S28    |
|             | D1217 O $\delta$ 1   | W31 N $\epsilon$ |                    |                | M1214                   | G30    |
|             |                      |                  |                    |                | M1214                   | W31    |
|             |                      |                  |                    |                | M1215                   | G30    |
|             |                      |                  |                    |                | M1215                   | W31    |
|             |                      |                  |                    |                | M1215                   | T102   |
|             |                      |                  |                    |                | D1217                   | R24    |
|             |                      |                  |                    |                | D1217                   | W31    |
|             |                      |                  |                    |                | Q1218                   | V85    |
|             |                      |                  |                    | Q1218          | T86                     |        |
|             |                      |                  |                    | G1219          | F89                     |        |
| GAPmin      | Q1255 O $\epsilon$ 1 | T88 O $\gamma$   |                    |                | L1252                   | T102   |
|             | Q1255 N $\epsilon$ 2 | T88 O $\gamma$   |                    |                | Y1254                   | T88    |
|             |                      |                  |                    |                | Y1254                   | P106   |
|             |                      |                  |                    |                | Q1255                   | P87    |
|             |                      |                  |                    |                | Q1255                   | T88    |
|             |                      |                  |                    |                | Q1255                   | F89    |
|             |                      |                  |                    |                | W1258                   | P87    |
|             |                      |                  |                    |                | H1366                   | P106   |
|             |                      |                  |                    | D1464          | A107                    |        |
| C-ter GAPex | K1517 N $\zeta$      | S27 O $\gamma$   |                    |                | K1517                   | S27    |
|             | K1517 N $\zeta$      | S28 O $\gamma$   |                    |                | K1517                   | S28    |

**Related to Figure 4.**
